# Supplementary material for: Consumption of Dairy Products in Relation to Type 2 Diabetes Mellitus in Chinese People: The Henan Rural Cohort Study and an Updated Meta-Analysis
Source: MDPI journal article supplement (doi:10.3390/nu12123827), 2020-12-15
Supplement: s1 [file s1]

| Supplementary table 1 Search terms in meta-analysis of association between total dairy and type 2 diabetes mellitus |                                                                                                                                                                                                                                                     |
|---------------------------------------------------------------------------------------------------------------------|-----------------------------------------------------------------------------------------------------------------------------------------------------------------------------------------------------------------------------------------------------|
| Search date                                                                                                         | Search term                                                                                                                                                                                                                                         |
| 2019.12.0.2                                                                                                         | #1 milk*[tiab] OR dairy*[tiab] OR dairy product*[tiab] OR<br>cheese*[tiab] OR butter*[tiab] OR cream*[tiab] OR yogurt*[tiab]<br>#2 diabetes<br>#3 prospective OR follow-up OR cohort OR longitudinal OR<br>cross sectional<br>#4 (#1 AND #2 AND #3) |

Supplemental Table 2 Type 2 diabetes mellitus according to total dairy intake: stratified analyses of the Henan Rural Cohort Study

|                                       | Median intake (g/d) of dairy products |                  |                  | <i>p</i> value for trend <sup>a</sup> |
|---------------------------------------|---------------------------------------|------------------|------------------|---------------------------------------|
|                                       | 0                                     | 16.67            | 53.68            |                                       |
| Stratified by age                     |                                       |                  |                  |                                       |
| <60y (1520 cases)                     | 1.00                                  | 0.95 (0.81,1.12) | 1.31 (1.11,1.54) | 0.002                                 |
| ≥60y (2134 cases)                     | 1.00                                  | 1.07 (0.93,1.24) | 1.56 (1.38,1.77) | <0.0001                               |
| Stratified by BMI                     |                                       |                  |                  |                                       |
| <25 kg/m <sup>2</sup> (1409 cases)    | 1.00                                  | 1.03 (0.87,1.21) | 1.38 (1.19,1.60) | <0.0001                               |
| ≥25 kg/m <sup>2</sup> (2245 cases)    | 1.00                                  | 0.94 (0.81,1.08) | 1.31 (1.15,1.49) | <0.0001                               |
| Stratified by physical activity level |                                       |                  |                  |                                       |
| Low (1432 cases)                      | 1.00                                  | 1.11 (0.93,1.32) | 1.37 (1.18,1.60) | <0.0001                               |
| Moderate (1291)                       | 1.00                                  | 0.87 (0.73,1.04) | 1.28 (1.09,1.52) | 0.009                                 |
| High (931 cases)                      | 1.00                                  | 0.90 (0.73,1.12) | 1.34 (1.10,1.64) | 0.009                                 |
| Stratified by diabetes family history |                                       |                  |                  |                                       |
| Yes (361 cases)                       | 1.00                                  | 0.75 (0.51,1.10) | 1.62 (1.14,2.32) | 0.023                                 |
| No (3293 cases)                       | 1.00                                  | 1.00 (0.89,1.12) | 1.32 (1.19,1.47) | <0.0001                               |

<sup>a</sup>*P*-trend was calculated by assigning median values to each group and was treated as continuous variable.

<sup>b</sup>All multivariate models were adjusted for age, sex, smoking, alcohol, physical activity, per capita monthly income, education level, energy, staple-food, livestock, poultry, fish, egg, fruit, vegetables, bean, nut, grains, HF-total, BMI, waist circumference, family history of T2DM, TC, HDL-C, TG, LDL-C.

Supplementary Table 3. ORs of T2DM according to servings per day of dairy products(n=38735) of the Henan Rural Cohort Study.

|                 |             | Servings per day of dairy products |                  |       | <i>p</i> value for trend |
|-----------------|-------------|------------------------------------|------------------|-------|--------------------------|
|                 |             | 0                                  | 0-1.00           | ≥1.00 |                          |
|                 |             |                                    |                  |       |                          |
| All             |             |                                    |                  |       |                          |
| Cases/ <i>n</i> | 2502/ 26466 | 475/ 5828                          | 677/ 6441        |       |                          |
| Model 1         | 1.00        | 0.90 (0.81,1.00)                   | 1.20 (1.09,1.31) |       | <0.01                    |
| Model 2         | 1.00        | 0.96 (0.86,1.07)                   | 1.29 (1.17,1.42) |       | <0.01                    |
| Model 3         | 1.00        | 0.97 (0.87,1.08)                   | 1.34 (1.21,1.48) |       | <0.01                    |
| Men             |             |                                    |                  |       |                          |
| Cases/ <i>n</i> | 905/10382   | 192/2425                           | 292/2527         |       |                          |
| Model 1         | 1.00        | 0.92 (0.78,1.08)                   | 1.38 (1.20,1.58) |       | <0.01                    |
| Model 2         | 1.00        | 0.98 (0.82,1.16)                   | 1.40 (1.21,1.63) |       | <0.01                    |
| Model 3         | 1.00        | 0.97 (0.82,1.15)                   | 1.43 (1.20,1.66) |       | <0.01                    |
| Women           |             |                                    |                  |       |                          |
| Cases/ <i>n</i> | 1597/16084  | 283/3403                           | 385/3914         |       |                          |
| Model 1         | 1.00        | 0.90 (0.79,1.03)                   | 1.11 (0.98,1.25) |       | 0.65                     |
| Model 2         | 1.00        | 0.97 (0.85,1.12)                   | 1.29 (1.14,1.46) |       | <0.01                    |
| Model 3         | 1.00        | 0.99 (0.86,1.14)                   | 1.32 (1.16,1.50) |       | <0.01                    |

1 serving = 50g; Model 1: adjusted for age, sex. Model 2: Model 1 plus smoking, alcohol, physical activity, per capita monthly income, education level, energy, staple-food, livestock, poultry, fish, egg, fruit, vegetables, bean, nut, grains, high fat-total, BMI, waist circumference, family history of T2DM. Model 3: Model 2 plus TC, HDL-C, TG, LDL-C.

Supplementary table 4 Characteristics of included studies of total dairy consumption and type 2 diabetes mellitus of the meta-analysis

| First Author | Publication year | Study name              | Country     | Follow-up time (year) | Population                                               | Method of dietary exposure assessment | Method of diabetes assessment                                                                                                                                     | Adjustment variables                                                                                                                                                                                                                                                               |
|--------------|------------------|-------------------------|-------------|-----------------------|----------------------------------------------------------|---------------------------------------|-------------------------------------------------------------------------------------------------------------------------------------------------------------------|------------------------------------------------------------------------------------------------------------------------------------------------------------------------------------------------------------------------------------------------------------------------------------|
| Chen         | 2019             | RS-I<br>RS-II<br>RS-III | Netherlands | 7.2                   | ≥45;<br>41.4%men;<br>643 cases,<br>6813<br>subjects      | 170-item<br>FFQ,<br>389-item<br>FFQ;  | 1.Fasting blood glucose concentration of 7.0mmol/L or higher 2.Non- fasting blood glucose concentration of 11.1mmol/L or higher 3. The use of hypo-glycemic drugs | Total fat intake, total energy intake, alcohol intake, age, sex, smoking status, education level, diet quality score, physical activity and family history of diabetes, time point of WC measurements, longitudinal WC, the interaction between protein intake and longitudinal WC |
| Talaei       | 2018             | SCHS                    | China       | 12                    | 45–74;<br>42.7 %men;<br>5207 cases,<br>45426<br>subjects | 165-item<br>semi-quantitative<br>FFQ; | Self-reported                                                                                                                                                     | Age, sex, dialect, year of interview, educational level, body mass index, physical activity, smoking status, alcohol use, baseline history of self-reported hypertension, total energy intake, vegetable, fruit, soy-rich pattern, dim sum, meat-rich pattern, coffee, soda        |

|                 |      |                                                                                          |             |      |                                               |                             |                                                                                                                            |                                                                                                                                                                                                                                                                                                                                                                                                      |
|-----------------|------|------------------------------------------------------------------------------------------|-------------|------|-----------------------------------------------|-----------------------------|----------------------------------------------------------------------------------------------------------------------------|------------------------------------------------------------------------------------------------------------------------------------------------------------------------------------------------------------------------------------------------------------------------------------------------------------------------------------------------------------------------------------------------------|
| Brouwer-Brolsma | 2018 | the Lifelines Cohort Study                                                               | Netherlands | 0    | 45 ± 13; 41%men; 1305 cases; 112086 subjects  | flower FFQ                  | ND-T2DM was defined as having a FPG ≥7•0 mmol/L or HbA1c≥6•5%                                                              | age, sex , alcohol, smoking , education , physical activity , total energy intake , the intake of energy-adjusted bread, pasta, rice, potato, fruit, vegetables, legumes, meat, fish, coffee, tea, soda/fruit juice, other dairy product groups , BMI and waist circumference                                                                                                                        |
| Virtanen        | 2017 | KIHD                                                                                     | Finland     | 19.3 | 53.1±5.2; 100%men; 432 cases; 2332 subjects   | 4-d dietary records;        | Self-administered questionnaires, fasting blood glucose measurements, 2-h oral glucose tolerance tests, national registers | Age, examination year, energy intake, marital status, income, use of hypertension medication, family history of diabetes, pack-years of smoking, education, leisure-time physical activity, serum ferritin, alcohol intake, glycaemic index, and dietary intakes of fibre, Mg, coffee, cholesterol, and SFA, MUFA, PUFA and trans-fatty acids, BMI, fasting plasma glucose and fasting serum insulin |
| Hruby           | 2017 | The National Heart, Lung, and Blood Institute s Framingh am Heart Study Offspring Cohort | USA         | 12   | 54.0±9.7; 46% men; 196 cases; 2809 subjects   | 126-item FFQ                | use of an oral hypoglycemic drug or insulin, or the first measurement of FG ≥7.0 mmol/L (≥126 mg/dL)incident               | age, sex, energy intake, parental history of diabetes, baseline smoking status, dyslipidemia or treatment, hypertension or treatment, means of other dietary characteristics, including intake of coffee, nuts, fruits, vegetables, meats, alcohol, and fish; the glycemic index, other dairy intake, baseline BMI, weight change over follow-up                                                     |
| Simone          | 2016 | the Maastric ht Study                                                                    | Netherlands | 0    | 59.9±8.2; 50.9% men; 125 cases; 2391 subjects | the Dutch national FFQ tool | Oral glucose tolerance test                                                                                                | age ,sex, BMI, physical activity, smoking status, education and intakes of energy, vegetables, fruits, meat and fish                                                                                                                                                                                                                                                                                 |

|                 |      |                    |             |     |                                               |                                                                |                                                                                                                                                                                                                              |                                                                                                                                                                                                                                                                                                                                                                                                                                                                                                       |
|-----------------|------|--------------------|-------------|-----|-----------------------------------------------|----------------------------------------------------------------|------------------------------------------------------------------------------------------------------------------------------------------------------------------------------------------------------------------------------|-------------------------------------------------------------------------------------------------------------------------------------------------------------------------------------------------------------------------------------------------------------------------------------------------------------------------------------------------------------------------------------------------------------------------------------------------------------------------------------------------------|
| Brouwer-Brolsma | 2016 | RS                 | Netherlands | 9.5 | 65.1±6.7; 40%men; 393 cases; 2974 subjects    | 170 food items FFQ;                                            | Records of general practitioners' (including laboratory glucose measurements), hospital discharge letters, and serum glucose measurements                                                                                    | Age, sex, alcohol , smoking, education, physical activity , BMI, total energy intake, energy adjusted meat intake, energy-adjusted fish intake, potential intermediates                                                                                                                                                                                                                                                                                                                               |
| Andrés          | 2016 | PREDIM ED          | Spain       | 4.1 | 66.6±6.6; 38.4% men; 270 cases; 3454 subjects | 137-item semi-quantitative FFQ;                                | Clinical diagnosis or use of anti diabetic medication                                                                                                                                                                        | Age, sex, BMI, dietary intervention group, leisure time physical activity, educational level , smoking, hypertension or antihypertensive use ,fasting glucose, HDL-cholesterol, triglyceride concentrations, cumulative average consumption of dietary variables in energy-adjusted quintiles, alcohol age, sex, date of blood drawn, controlled for family history of diabetes, BMI at baseline, WCBMI at baseline, total energy intake, high BP, high TG , high cholesterol at baseline, BMI change |
| Nazanin         | 2015 | TLGS               | Iran        | 9   | 43.6±12.0; 45.7% men; 178 cases; 520 subjects | 168-item semi-quantitative food frequency questionnaire (FFQ)  | the American Diabetes Association (ADA) at follow-up examinations: (1) fasting plasma glucose (FPG) 126 mg/dL (7 mmol/L) or (2) 2 h-plasma glucose (2 h-PG) after consumption of 75 g glucose (OGTT) 200 mg/dL (11.1 mmol/L) | Age, sex, method version, season, education, BMI, leisure-time physical activity, smoking, intakes of total energy and alcohol                                                                                                                                                                                                                                                                                                                                                                        |
| Ericson         | 2015 | MDC                | Sweden      | 14  | 45–74; 38.8%men; 2860 cases; 24070 subjects   | A 7-d menu book, a 168-item questionnaire, a 45-min interview; | Used information on the date of diagnosis from the registers prioritised in the following order: (1) the Regional Diabetes 2000 Register of Scania (2) the Malmo HbA1c Register (3)the Swedish National Diabetes Register    | Age, sex, method version, season, education, BMI, leisure-time physical activity, smoking, intakes of total energy and alcohol                                                                                                                                                                                                                                                                                                                                                                        |
| O'Connor        | 2014 | EPIC-Norfolk Study | UK          | 11  | 40–79; 44%men; 752 cases; 4126 subjects       | 130-item semi-quantitative FFQ,7-d food diary;                 | Self-report confirmed by record linkage with several databases                                                                                                                                                               | Age, sex, BMI, family history of diabetes, smoking, alcohol, physical activity, social class, education level, energy, fiber, fruit, vegetables, red                                                                                                                                                                                                                                                                                                                                                  |

|         |      |                                     |           |    |                                                 |                                                    |                                                                                                                            |                                                                                                                                                                                                                                                                         |
|---------|------|-------------------------------------|-----------|----|-------------------------------------------------|----------------------------------------------------|----------------------------------------------------------------------------------------------------------------------------|-------------------------------------------------------------------------------------------------------------------------------------------------------------------------------------------------------------------------------------------------------------------------|
|         |      |                                     |           |    |                                                 |                                                    |                                                                                                                            | meat, processed meat, coffee intake                                                                                                                                                                                                                                     |
| Geng    | 2014 | NHAPCS                              | China     | 6  | 50–70; 41%men; 507 cases; 2091 subjects         | 74-item FFQ;                                       | Self-report, Use of any oral hypoglycemic medication or insulin, or fasting glucose $\geq 7.0$ mmol/L                      | Age, sex, region, residence, smoking, family history of diabetes, BMI, dietary fiber intake, changes in BMI and waistline                                                                                                                                               |
| Chen    | 2014 | NHS                                 | USA       | 30 | 52 $\pm$ 9.3; Women; 7841 cases; 76874 subjects | 61-item FFQ; 131-item FFQ                          | biennial questionnaire were mailed a supplementary questionnaire about symptoms and treatment                              | age, alcohol consumption , physical activity level, smoking status , race , menopausal status and hormone use in women, family history of diabetes, history of hypertension and hypercholesterolemia, quintiles of total calories, and dietary score, a BMI category    |
|         |      | NHS II                              |           | 16 | 46 $\pm$ 7.1; Women; 3951 cases; 88262 subjects | 131-item FFQ                                       |                                                                                                                            |                                                                                                                                                                                                                                                                         |
|         |      | HPFS                                |           | 24 | 36 $\pm$ 4.6 Men; 3364 cases; 41349 subjects    | 131-item FFQ                                       |                                                                                                                            |                                                                                                                                                                                                                                                                         |
| Sabita  | 2013 | Whitehall II study                  | UK        | 10 | 56 $\pm$ 6.1; 72%men; 273 cases; 4186 subjects  | Validated 114 items FFQ;                           | Self-report of doctor's diagnosis, initiation of anti diabetic medication, a 2-h 75-g oral-glucose tolerance test          | Age, sex, ethnicity, employment grade, smoking, alcohol intake, BMI, physical activity, family history of coronary heart disease/hypertension , fruit, vegetables, bread, meat, fish, coffee, tea, total energy intake                                                  |
| Struijk | 2013 | Inter99 Study                       | Denmark   | 5  | 30-60; 48%men; 214 cases; 5232 subjects;        | Validated 114 items FFQ;                           | Fasting plasma glucose $\geq 7.0$ mmol/L and/or 2-h plasma glucose $\geq 11.1$ mmol/L based on 1oral-glucosetolerance test | Age, sex, intervention group, diabetes family history, education level, physical activity, smoking status, intake of alcohol, wholegrain cereal, meat, fish, coffee, tea, fruit, vegetables, energy, change in diet form baseline to 5-y follow-up, waist circumference |
| Louie   | 2013 | the Blue Mountains Eye Study (BMES) | Australia | 10 | 63 $\pm$ 8.1; 44% men; 145 cases; 1824 subjects | a 145-item self administered semi-quantitative FFQ | Fasting blood glucose > 5.6 mmol/L or diagnosed T2DM                                                                       | age, sex systolic blood pressure , baseline BMI status, HDL cholesterol , total cholesterol ,triglyceride , calcium                                                                                                                                                     |

|          |      |                                                  |           |      |                                                                     |                                                                                                                                  |                                                                                                                                                                                                                               |                                                                                                                                                                                                                                                                                                                                                                                  |
|----------|------|--------------------------------------------------|-----------|------|---------------------------------------------------------------------|----------------------------------------------------------------------------------------------------------------------------------|-------------------------------------------------------------------------------------------------------------------------------------------------------------------------------------------------------------------------------|----------------------------------------------------------------------------------------------------------------------------------------------------------------------------------------------------------------------------------------------------------------------------------------------------------------------------------------------------------------------------------|
| Grantham | 2013 | AusDiab                                          | Australia | 5    | 25-88;<br>45%men;<br>209 cases;<br>5582<br>subjects                 | 121-<br>itemFFQ                                                                                                                  | Fasting plasma<br>glucose $\geq 7.0$<br>mmol/L or 2-h post<br>load plasma<br>glucose $\geq 11.1$<br>mmol/L or<br>treatment with insulin<br>or oral<br>hypoglycemic agents                                                     | Age, sex, energy<br>intake, family<br>history of diabetes,<br>education level,<br>level of physical<br>activity, smoking<br>status, triglycerides,<br>HDL cholesterol,<br>systolic blood<br>pressure, waist<br>circumference, hip<br>circumference                                                                                                                               |
| Sluijs   | 2012 | (EPIC)-<br>Inter Act<br>case-<br>cohort<br>study | Europe    | 12.3 | 52.2 $\pm$ 8.9;<br>38%men;<br>12403cases<br>;<br>340234<br>subjects | self or<br>interviewer-<br>administere<br>d dietary<br>questionnair<br>es                                                        | using multiple<br>sources of evidence<br>including self report,<br>linkage to primary<br>care registers and<br>secondary care<br>registers, medication<br>use (drug registers),<br>hospital admissions,<br>and mortality data | center, age, sex,<br>BMI, educational<br>level, smoking<br>status, physical<br>activity level, and<br>alcohol intake,<br>intake of energy and<br>energy-adjusted<br>intakes of fruit plus<br>vegetables, red<br>meat, processed<br>meat, sugar<br>sweetened soft<br>drinks, coffee,<br>cereals, cereal<br>products, dietary<br>intake of calcium,<br>magnesium, and<br>vitamin D |
| Margolis | 2011 | WHI-OS                                           | USA       | 8    | 50–79;<br>Women;<br>3946 cases;<br>82073<br>subjects                | a<br>semiquantit<br>ative FFQ<br>designed for<br>the WHI<br>that<br>inquired<br>about the<br>average use<br>of 122 line<br>items | self-reports of<br>diabetes treatment<br>were matched by the<br>medication inventory                                                                                                                                          | age, race/ethnicity,<br>total energy intake,<br>income, education,<br>smoking, alcohol<br>intake, family<br>history of diabetes,<br>use of<br>postmenopausal<br>hormone therapy,<br>systolic blood<br>pressure, diastolic<br>blood pressure,<br>BMI, and physical<br>activity, dietary<br>glycemic load ,<br>dietary total fat ,<br>dietary total fiber,<br>total magnesium      |
| Kirii    | 2009 | JPHC                                             | Japan     | 5    | 45-75;<br>42.9% men;<br>1114 cases;<br>59796<br>subjects            | 147-item<br>FFQ;                                                                                                                 | Self-administered<br>questionnaire                                                                                                                                                                                            | Age , area , BMI,<br>family history of<br>diabetes mellitus,<br>smoking status ,<br>alcohol intake,<br>history of<br>hypertension,<br>exercise frequency,<br>consumption of<br>coffee , energy-<br>adjusted<br>magnesium, total<br>energy                                                                                                                                        |

|        |      |               |     |    |                                                |                                                                                  |                                                                                                                                                                                                                  |                                                                                                                                                                                                                                                                                                                   |
|--------|------|---------------|-----|----|------------------------------------------------|----------------------------------------------------------------------------------|------------------------------------------------------------------------------------------------------------------------------------------------------------------------------------------------------------------|-------------------------------------------------------------------------------------------------------------------------------------------------------------------------------------------------------------------------------------------------------------------------------------------------------------------|
| Elwood | 2007 | Caerphilly    | UK  | 25 | 45-59; Men; 41 cases; 640 subjects             | a 7-day weighed dietary intake record                                            | Plasma insulin level $\geq 163\text{mmol/l}$ and/or plasma glucose $\geq 6.1\text{mmol/l}$                                                                                                                       | Age, smoking, BMI, social class                                                                                                                                                                                                                                                                                   |
| Dam    | 2006 | Black Women's | USA | 8  | 21-69; Women; 1964 cases; 41186 subjects       | 68-item baseline Block food frequency questionnaire                              | Fasting plasma glucose $\geq 7.0\text{mmol/L}$ or 2h post-load plasma glucose $\geq 11.1\text{mmol/L}$                                                                                                           | Age, energy, BMI, smoking, physical activity, alcohol consumption, parental history of diabetes, education, coffee, diet.                                                                                                                                                                                         |
| Liu    | 2006 | WHS           | USA | 10 | $\geq 45$ ; 0% men; 1603 cases; 39876 subjects | A validated SFFQ that inquired about the average use of 131 foods and beverages; | By asking women to report these items on annual follow-up Questionnaires; validated by using the ADA criteria; primarily obtain additional information with a telephone interview and supplemental questionnaire | Total energy intake, randomized-treatment assignment, age, family history of diabetes, smoking status, BMI, hypercholesterolemia, hypertension, physical activity, hormones, alcohol consumption, dietary intakes, fibers, total fat, dietary glycemic load, quintiles of dietary, calcium, vitamin D, magnesium. |

---



**Supplementary table 5 Quality assessment of cohort studies included in meta-analysis  
(Newcastle-Ottawa Quality Assessment Scale)**

| First author,<br>year        | Cohort                                     | Selection |    |    |    |               | Comparability |           |               | Outcome |    |    |           | Total<br>(9Max) |
|------------------------------|--------------------------------------------|-----------|----|----|----|---------------|---------------|-----------|---------------|---------|----|----|-----------|-----------------|
|                              |                                            | Q1        | Q2 | Q3 | Q4 | Sub-<br>Total | Q1<br>A*      | Q1<br>B** | Sub-<br>Total | Q1      | Q2 | Q3 | Sub-Total |                 |
| Chen 2019                    | RS-I                                       | 1         | 1  | 1  | 1  | 4             | 1             | 1         | 2             | 1       | 1  | 0  | 2         | 8               |
|                              | RS-II                                      | 1         | 1  | 1  | 1  | 4             | 1             | 1         | 2             | 1       | 1  | 0  | 2         | 8               |
|                              | RS-III                                     | 1         | 1  | 1  | 1  | 4             | 1             | 0         | 1             | 1       | 1  | 0  | 2         | 7               |
| Talaei 2018                  | SCHS                                       | 1         | 1  | 1  | 1  | 4             | 1             | 0         | 1             | 0       | 1  | 1  | 2         | 7               |
| Brouwer-<br>Brolsma1<br>2018 | the Lifelines<br>Cohort<br>Study           | 1         | 1  | 1  | 0  | 3             | 0             | 1         | 1             | 1       | 1  | 0  | 2         | 6               |
| Virtanen 2017                | KIHD                                       | 1         | 1  | 1  | 1  | 4             | 1             | 1         | 2             | 1       | 1  | 1  | 3         | 9               |
| Hruby 2017                   | The NHL<br>and<br>BFHSOC                   | 0         | 1  | 1  | 1  | 3             | 1             | 0         | 1             | 1       | 1  | 1  | 3         | 7               |
| Eussen 2016                  | the<br>Maastricht<br>Study                 | 0         | 1  | 1  | 1  | 3             | 0             | 1         | 1             | 0       | 1  | 1  | 2         | 6               |
| BrouwerBrolsma<br>2016       | the<br>Rotterdam<br>Study                  | 1         | 1  | 1  | 1  | 4             | 1             | 0         | 1             | 1       | 1  | 1  | 3         | 8               |
| Andrés 2016                  | PREDIMED                                   | 0         | 1  | 1  | 1  | 3             | 1             | 0         | 1             | 1       | 0  | 1  | 2         | 6               |
| Moslehi 2015                 | TLGS                                       | 1         | 1  | 1  | 1  | 4             | 0             | 1         | 1             | 0       | 1  | 1  | 2         | 7               |
| O'Connor 2014                | EPIC-<br>Norfolk<br>Study                  | 1         | 1  | 1  | 1  | 4             | 1             | 1         | 2             | 0       | 1  | 1  | 2         | 8               |
| Geng 2014                    | NHAPC                                      | 1         | 1  | 1  | 1  | 4             | 0             | 0         | 0             | 0       | 1  | 1  | 2         | 6               |
| Sabita 2013                  | Whitehall II<br>study                      | 1         | 1  | 1  | 1  | 4             | 1             | 0         | 1             | 1       | 1  | 1  | 3         | 8               |
| Struijk 2013                 | Inter99<br>Study                           | 1         | 1  | 1  | 1  | 4             | 1             | 1         | 2             | 1       | 1  | 0  | 2         | 8               |
| Kirii 2013                   | JPHC                                       | 1         | 1  | 1  | 1  | 4             | 1             | 1         | 2             | 0       | 1  | 0  | 1         | 7               |
| Ericson 2015                 | MDC                                        | 1         | 1  | 1  | 1  | 4             | 1             | 0         | 1             | 1       | 1  | 0  | 2         | 7               |
| Louie 2013                   | BMES                                       | 1         | 1  | 1  | 1  | 4             | 0             | 1         | 1             | 1       | 0  | 0  | 1         | 6               |
| Grantham<br>2013             | AusDiab                                    | 1         | 1  | 1  | 1  | 4             | 1             | 1         | 2             | 1       | 0  | 0  | 1         | 7               |
| Sluijs 2012                  | EPIC)-<br>InterAct<br>case-cohort<br>study | 1         | 1  | 1  | 1  | 4             | 1             | 0         | 1             | 1       | 0  | 1  | 2         | 7               |
| Chen 2014                    | NHS                                        | 0         | 1  | 1  | 1  | 3             | 1             | 1         | 2             | 0       | 1  | 1  | 2         | 7               |
|                              | NHS II                                     | 0         | 1  | 1  | 1  | 3             | 1             | 1         | 2             | 0       | 1  | 1  | 2         | 7               |
|                              | HPFS                                       | 0         | 1  | 1  | 1  | 3             | 1             | 1         | 2             | 0       | 1  | 1  | 2         | 7               |
| Karen 2011                   | WHI-OS                                     | 1         | 1  | 1  | 1  | 4             | 1             | 0         | 1             | 1       | 1  | 1  | 3         | 8               |
| Liu 2006                     | WHS                                        | 1         | 1  | 1  | 1  | 4             | 1             | 1         | 2             | 0       | 1  | 1  | 2         | 8               |
| Elwood 2007                  | CAPS                                       | 1         | 1  | 1  | 1  | 4             | 1             | 0         | 1             | 0       | 1  | 0  | 1         | 6               |
| Dam 2006                     | BWHS                                       | 1         | 1  | 1  | 1  | 4             | 1             | 1         | 2             | 0       | 1  | 1  | 2         | 7               |

\*adjusted for age and sex

\*\* adjusted for age, sex, BMI, energy intake, physical activity, smoking, alcohol, family history of diabetes

**Supplementary Table 6 Dose-response meta-analysis for per 100g/day increase in total dairy and risk of type 2 diabetes mellitus, stratified by study design, gender, age, follow-up, geographic location, number of cases of high vs. low intake**

| Dietary factor        | No of studies | RR   | 95% CI     | I <sup>2</sup> (%) | P     |
|-----------------------|---------------|------|------------|--------------------|-------|
| Total dairy           |               |      |            |                    |       |
| High vs. low          | 30            | 0.94 | 0.89, 1.00 | 51.6               | 0.001 |
| Dose-response         | 23            | 0.98 | 0.97, 1.00 | 55.2               | 0.001 |
| Study design          |               |      |            |                    |       |
| Cross-sectional study | 2             | 0.79 | 0.37, 1.69 | 82.0               | 0.018 |
| Cohort study          | 28            | 0.94 | 0.89, 1.00 | 49.0               | 0.002 |
| Gender                |               |      |            |                    |       |
| Women                 | 7             | 0.97 | 0.84, 1.12 | 55.9               | 0.034 |
| Men                   | 15            | 0.95 | 0.86, 1.04 | 53.2               | 0.008 |
| Men and women         | 8             | 0.92 | 0.83, 1.05 | 55.7               | 0.027 |
| Age                   |               |      |            |                    |       |
| <50                   | 8             | 1.00 | 0.95, 1.06 | 12.1               | 0.336 |
| ≥50                   | 22            | 0.92 | 0.85, 1.00 | 55.2               | 0.001 |
| Follow-up             |               |      |            |                    |       |
| <10 years             | 16            | 0.90 | 0.81, 0.99 | 54.0               | 0.005 |
| ≥10 years             | 14            | 0.97 | 0.91, 1.04 | 51.1               | 0.014 |
| Geographic location   |               |      |            |                    |       |
| Europe                | 10            | 1.00 | 0.88, 1.13 | 63.9               | 0.003 |
| America               | 11            | 0.97 | 0.91, 1.04 | 41.9               | 0.088 |
| Australia/Asia        | 9             | 0.85 | 0.76, 0.95 | 21.8               | 0.235 |
| Number of cases       |               |      |            |                    |       |
| <1000                 | 21            | 0.92 | 0.82, 1.02 | 51.6               | 0.003 |
| ≥1000                 | 9             | 0.96 | 0.90, 1.02 | 56.9               | 0.017 |

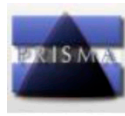

## PRISMA 2009 Flow Diagram

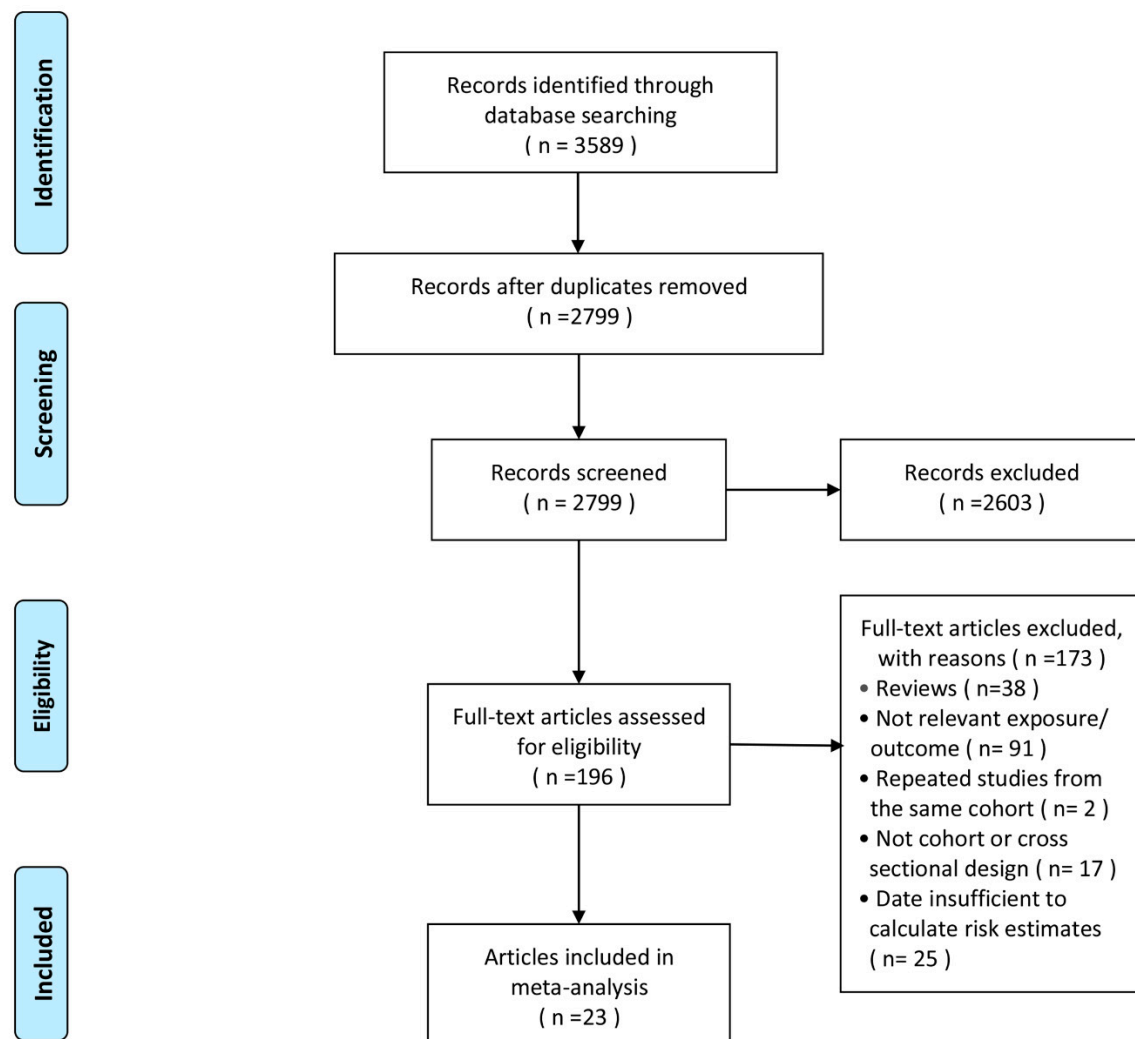

Supplementary Figure 1. flow diagram of the meta-analysis

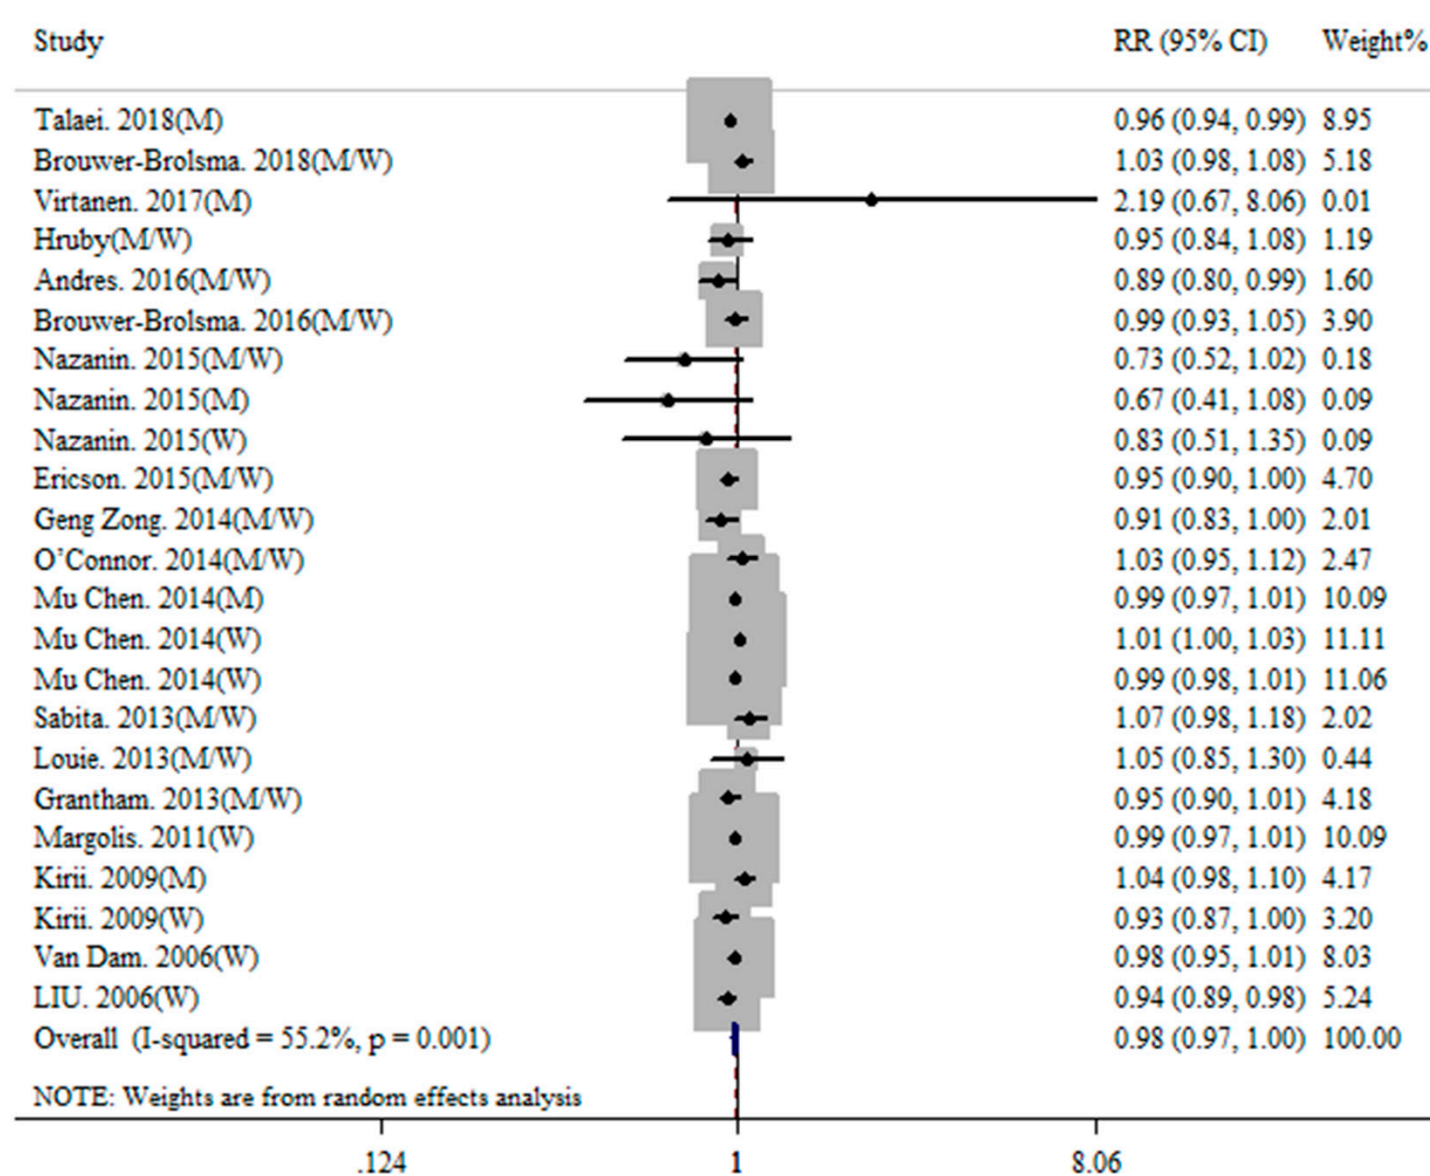

**Supplementary Figure 2. Prospective associations of dairy intake with incident type 2 diabetes mellitus for dose-response analysis of the meta-analysis**

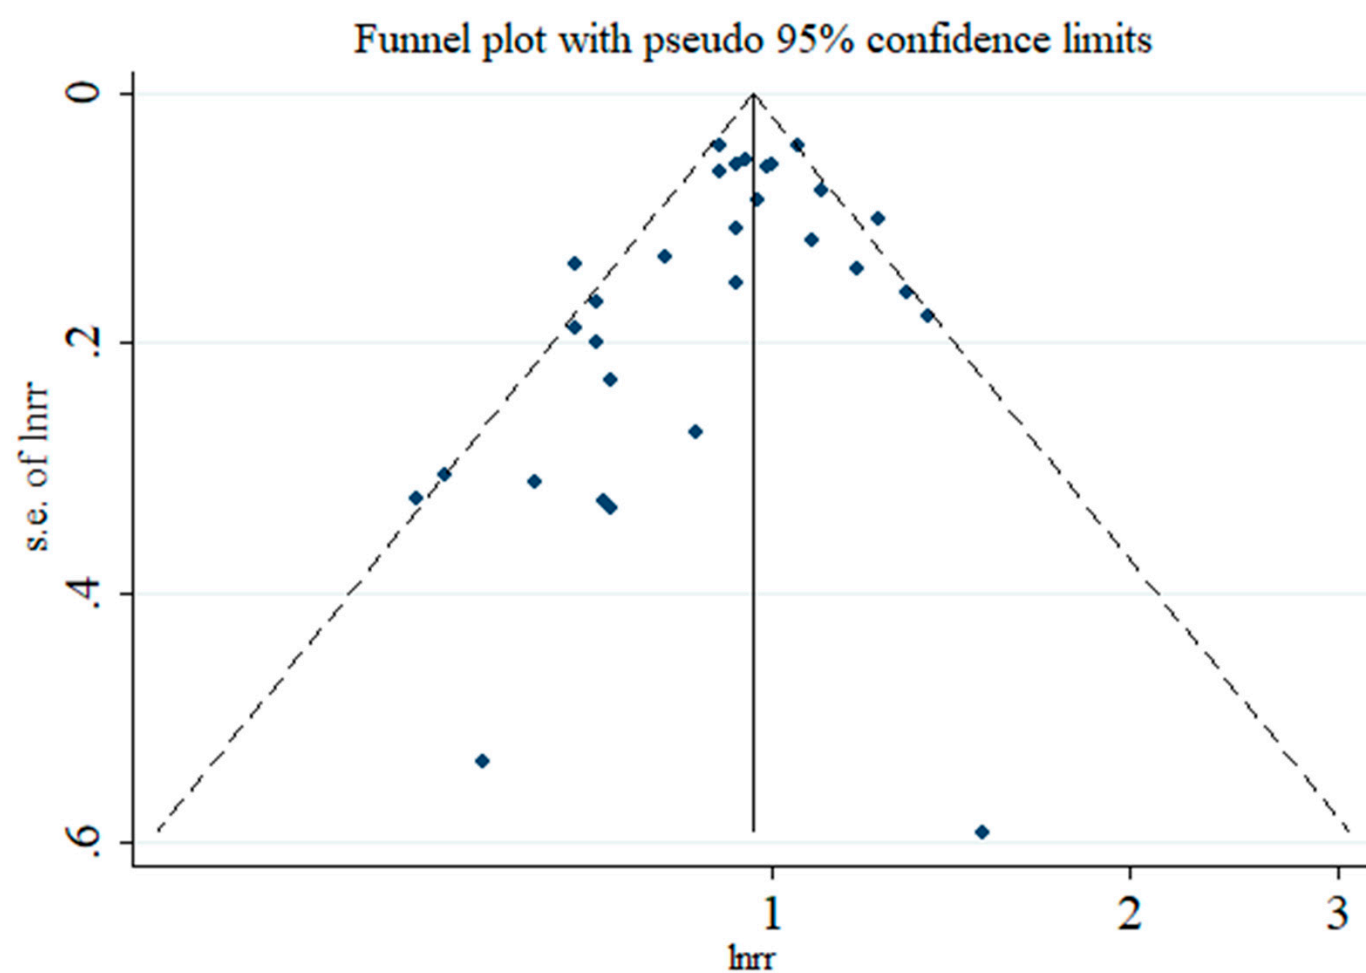

**Supplementary Figure 3: Funnel plots of dairy intake-T2D associations (high vs. low meta-analysis) SE = Standard error**

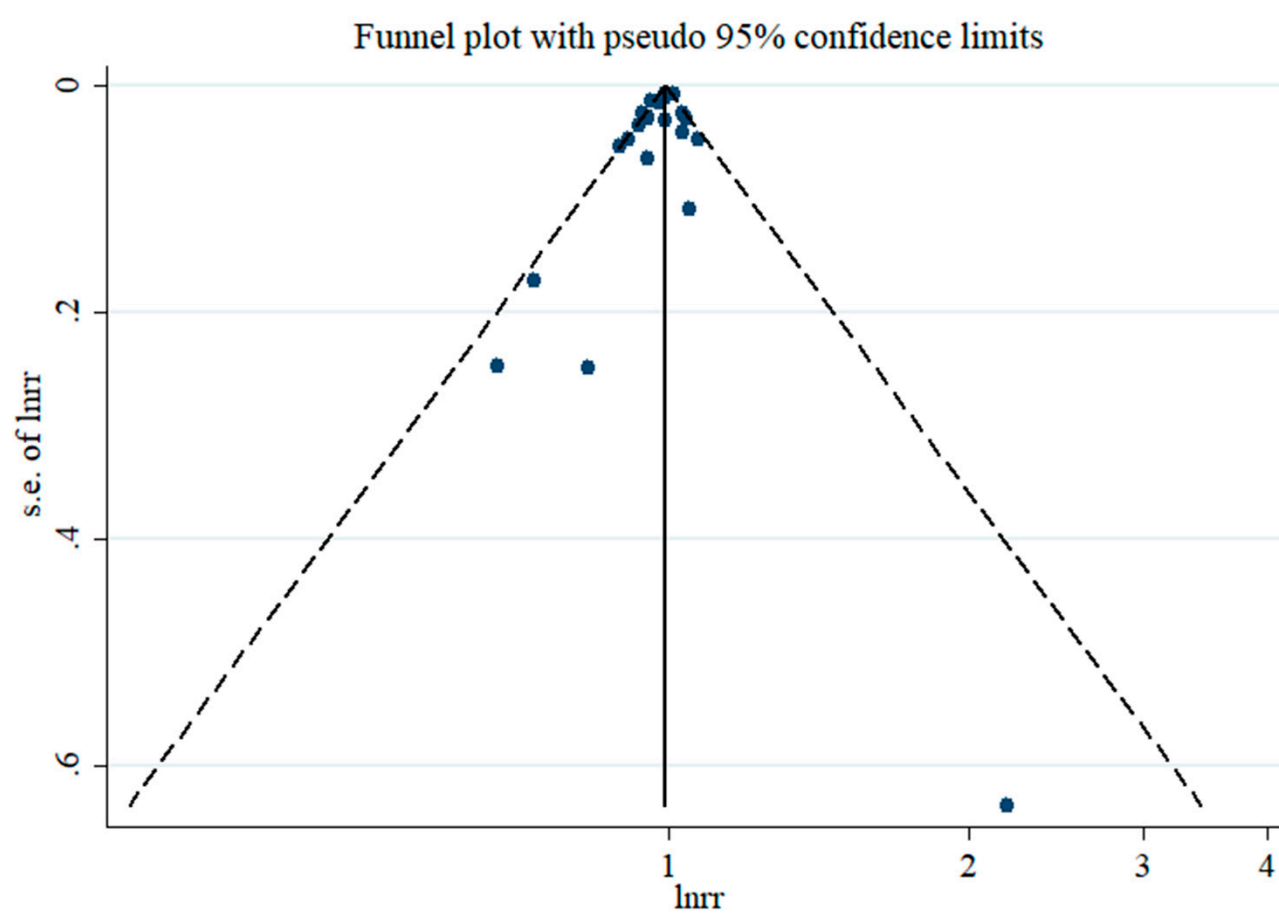

**Supplementary Figure 4: Funnel plots of dairy intake-T2D associations (dose-response meta-analysis) SE = Standard error**
